# Supplementary material for: Brain Distribution and Metabolism of Flupirtine, a Nonopioid Analgesic Drug with Antiseizure Effects, in Neonatal Rats
Source: MDPI journal article supplement (doi:10.3390/pharmaceutics10040281), 2018-12-16
Supplement: s1 [file s1]

# Brain Distribution and Metabolism of Flupirtine, a Nonopioid Analgesic Drug with Antiseizure Effects, in Neonatal Rats

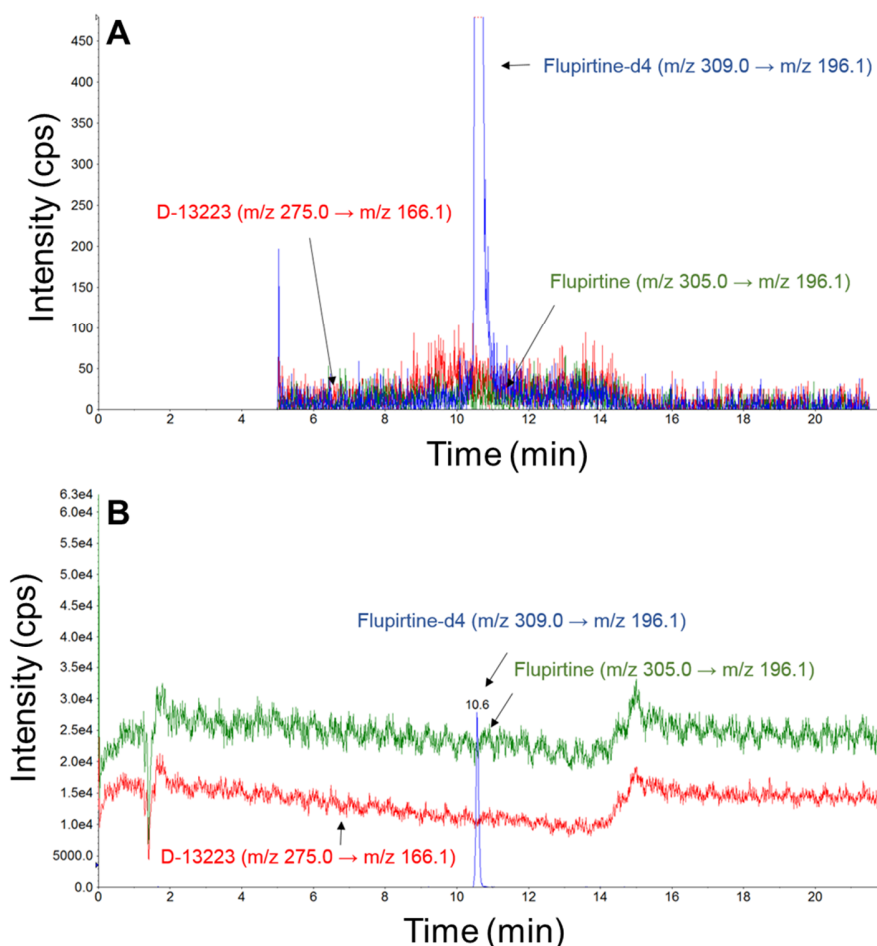

**Figure S1.** (A) An LC-MS/MS analysis of control liver extract in MRM mode spiked with flupirtine- $d_4$  (blue; 125 fmol on column) as a retention time marker. No interfering peaks were detected. (B) The analysis was repeated with a postcolumn infusion (10 mL/min) of a 25 nM (10.51 ng/mL) of flupirtine maleate solution and 25 nM (7.77 ng/mL) of D-13223 HCl solution mixed into the column eluent through a three-way junction. The signal intensity for flupirtine (green) and D-13223 (red) slowly tracks with the gradient. No matrix-based signal enhancement or suppression was detected.
